# Supplementary material
Source: PubMed Central journal article supplement (PMC8010899)
Supplement: NIHMS1607522-supplement-Sup1.pdf [file NIHMS1607522-supplement-Sup1.pdf]

**SUPPLEMENTARY MATERIAL**

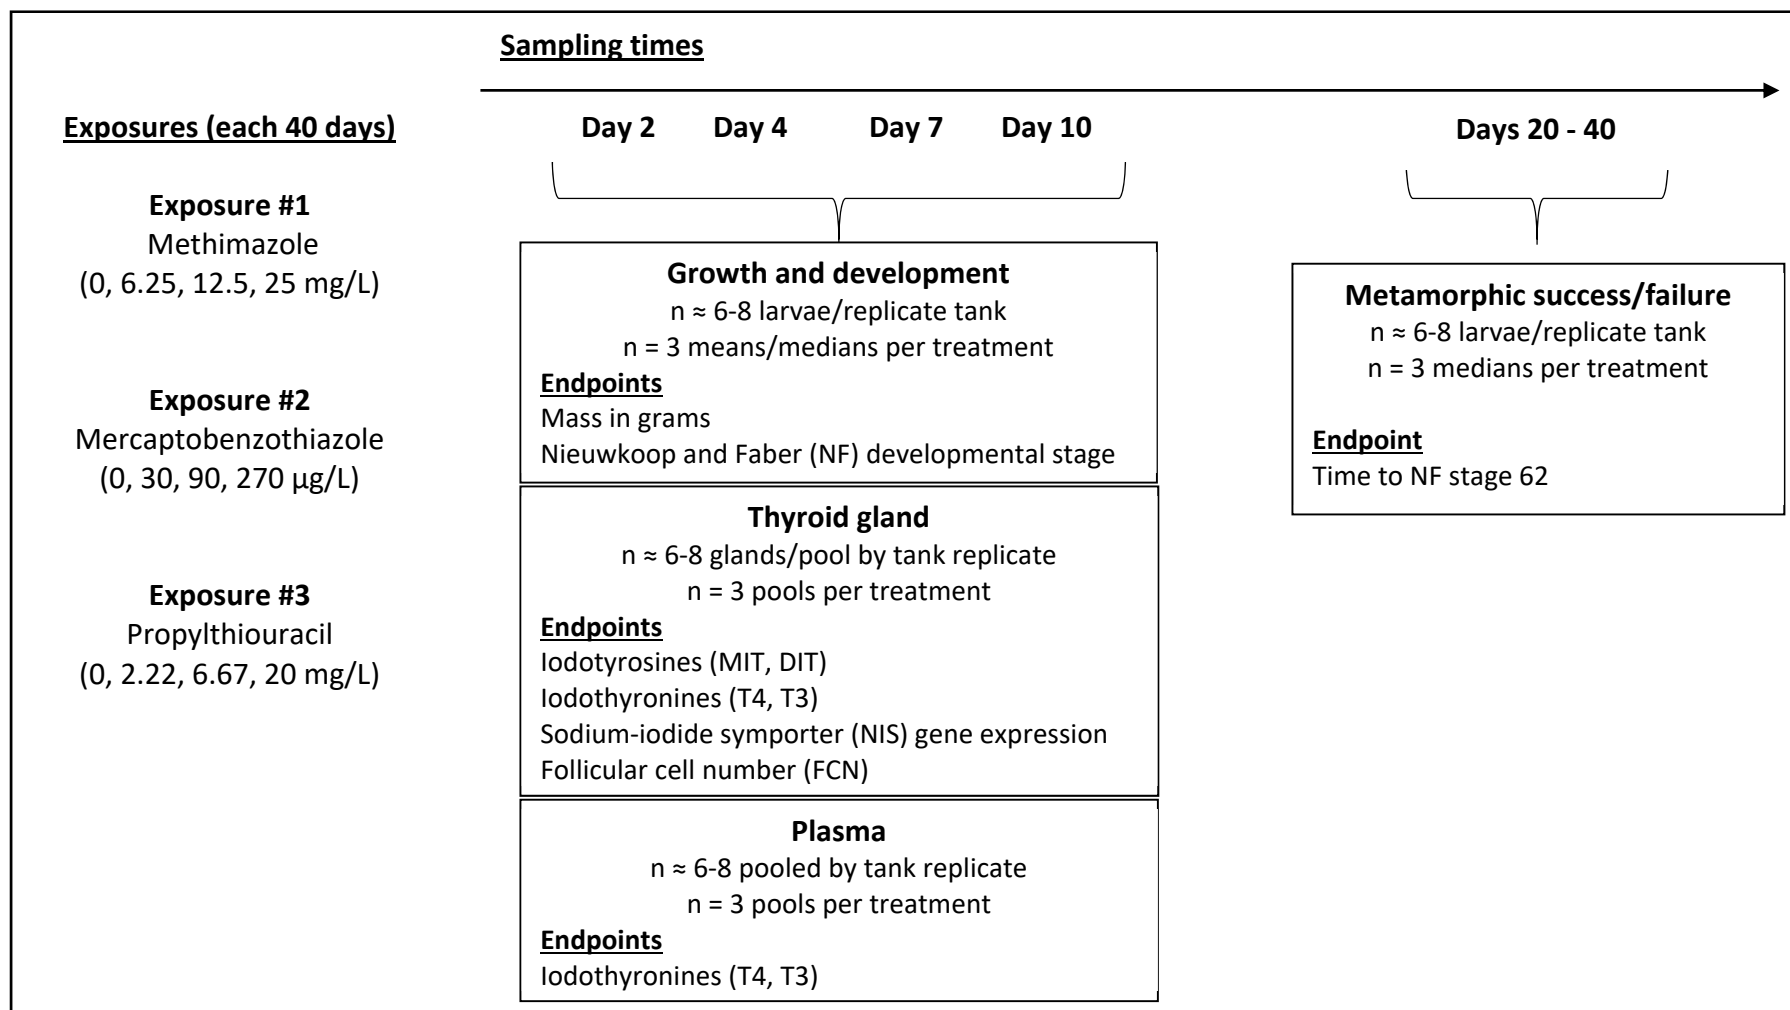

Figure S.1. Study design for pathway-based concentration-response and time-course aqueous exposures using three thyroperoxidase inhibitors starting with pro-metamorphic (Nieuwkoop and Faber stage 53/54) *Xenopus laevis* larvae.

Table S.1. Water chemistry summary for all tanks across each of three separate exposures.

|      | Temp.<br>(°C) | D.O.<br>(mg L <sup>-1</sup> ) | % O <sub>2</sub> Sat. | pH  | Conductivity<br>(μS cm <sup>-1</sup> ) | Alkalinity<br>(CaCO <sub>3</sub> L <sup>-1</sup> ) | Hardness<br>(CaCO <sub>3</sub> L <sup>-1</sup> ) |
|------|---------------|-------------------------------|-----------------------|-----|----------------------------------------|----------------------------------------------------|--------------------------------------------------|
| MMI  |               |                               |                       |     |                                        |                                                    |                                                  |
| Avg. | 21.3          | 6.7                           | 76.7                  | 7.4 | 109.0                                  | 45.8                                               | 46.3                                             |
| SD   | 0.2           | 0.6                           | 4.8                   | 0.1 | 2.2                                    | 0.7                                                | 0.7                                              |
| Min. | 20.6          | 3.7                           | 67.7                  | 7.2 | 104.3                                  | 45.0                                               | 45.0                                             |
| Max. | 21.8          | 8.1                           | 92.4                  | 7.7 | 112.4                                  | 47.0                                               | 47.0                                             |
| MBT  |               |                               |                       |     |                                        |                                                    |                                                  |
| Avg. | 21.3          | 7.0                           | 78.9                  | 7.1 | 102.6                                  | 47.0                                               | 46.2                                             |
| SD   | 0.2           | 0.3                           | 3.8                   | 0.3 | 3.6                                    | 0.7                                                | 0.7                                              |
| Min. | 20.9          | 6.4                           | 73.0                  | 6.1 | 98.8                                   | 46.0                                               | 45.0                                             |
| Max. | 21.9          | 7.7                           | 87.0                  | 7.4 | 109.7                                  | 48.0                                               | 47.0                                             |
| PTU  |               |                               |                       |     |                                        |                                                    |                                                  |
| Avg. | 21.0          | 6.6                           | 74.3                  | 7.4 | 101.6                                  | 43.8                                               | 44.9                                             |
| SD   | 0.2           | 0.3                           | 3.0                   | 0.1 | 4.2                                    | 0.8                                                | 1.4                                              |
| Min. | 20.2          | 6.0                           | 67.0                  | 7.2 | 95.2                                   | 43.0                                               | 43.0                                             |
| Max. | 21.5          | 7.2                           | 81.0                  | 7.6 | 108.4                                  | 45.0                                               | 47.0                                             |

D.O. = dissolved oxygen; MMI, methimazole; MBT, 2-mercaptobenzothiazole; PTU, propylthiouracil

Table S.2. Analytical verification summary of chemical exposure concentrations by high-performance liquid chromatography with diode array detection.

| Trt.                | Rep. tank | MMI           |                            |      |     |          |              | MBT           |                            |      |     |          |              | PTU           |                            |      |     |          |              |
|---------------------|-----------|---------------|----------------------------|------|-----|----------|--------------|---------------|----------------------------|------|-----|----------|--------------|---------------|----------------------------|------|-----|----------|--------------|
|                     |           | Nominal conc. | Mean measured conc. (mg/L) | SD   | CV  | <i>n</i> | % of nominal | Nominal conc. | Mean measured conc. (µg/L) | SD   | CV  | <i>n</i> | % of nominal | Nominal conc. | Mean measured conc. (mg/L) | SD   | CV  | <i>n</i> | % of nominal |
| Control             | 1         | 0 mg/L        | ND                         | 0    | 0   | 6        | n/a          | 0 µg/L        | ND                         | 0    | 0   | 4        | n/a          | 0 mg/L        | ND                         | 0    | 0   | 5        | n/a          |
|                     | 2         | 0 mg/L        | ND                         | 0    | 0   | 6        | n/a          | 0 µg/L        | ND                         | 0    | 0   | 4        | n/a          | 0 mg/L        | ND                         | 0    | 0   | 5        | n/a          |
|                     | 3         | 0 mg/L        | ND                         | 0    | 0   | 6        | n/a          | 0 µg/L        | ND                         | 0    | 0   | 4        | n/a          | 0 mg/L        | ND                         | 0    | 0   | 5        | n/a          |
| Low                 | 1         | 6.25 mg/L     | 7.4                        | 0.4  | 5.4 | 6        | 118          | 30 µg/L       | 27.0                       | 2.0  | 7.4 | 4        | 90           | 2.22 mg/L     | 2.47                       | 0.05 | 1.9 | 5        | 111          |
|                     | 2         | 6.25 mg/L     | 7.3                        | 0.4  | 5.2 | 6        | 118          | 30 µg/L       | 27.3                       | 1.8  | 6.5 | 4        | 91           | 2.22 mg/L     | 2.47                       | 0.05 | 1.8 | 5        | 111          |
|                     | 3         | 6.25 mg/L     | 7.4                        | 0.4  | 5.6 | 6        | 118          | 30 µg/L       | 27.6                       | 2.2  | 8.0 | 4        | 92           | 2.22 mg/L     | 2.47                       | 0.05 | 1.9 | 5        | 111          |
| Grand mean          |           |               | 7.4                        | 0.01 | 0.2 | 3        |              | 27.3          | 0.3                        | 1.2  | 3   |          | 2.47         | 0.00          | 0.03                       | 3    |     |          |              |
| Ungrouped trt. mean |           |               | 7.4                        | 0.4  | 5.1 | 18       |              | 27.3          | 1.8                        | 6.7  | 12  |          | 2.47         | 0.04          | 1.7                        | 15   |     |          |              |
| Medium              | 1         | 12.5 mg/L     | 14.7                       | 0.8  | 5.7 | 6        | 118          | 90 µg/L       | 79.9                       | 5.8  | 7.2 | 4        | 89           | 6.67 mg/L     | 7.48                       | 0.16 | 2.1 | 5        | 112          |
|                     | 2         | 12.5 mg/L     | 14.8                       | 0.8  | 5.7 | 6        | 118          | 90 µg/L       | 82.3                       | 6.2  | 7.5 | 4        | 91           | 6.67 mg/L     | 7.50                       | 0.15 | 2.0 | 5        | 112          |
|                     | 3         | 12.5 mg/L     | 14.8                       | 0.8  | 5.5 | 6        | 118          | 90 µg/L       | 83.0                       | 6.0  | 7.3 | 4        | 92           | 6.67 mg/L     | 7.49                       | 0.16 | 2.1 | 5        | 112          |
| Grand mean          |           |               | 14.8                       | 0.03 | 0.2 | 3        |              | 81.7          | 1.6                        | 2.0  | 3   |          | 7.49         | 0.01          | 0.1                        | 3    |     |          |              |
| Ungrouped trt. mean |           |               | 14.8                       | 0.8  | 5.3 | 18       |              | 81.7          | 5.6                        | 6.9  | 12  |          | 7.49         | 0.15          | 1.9                        | 15   |     |          |              |
| High                | 1         | 25 mg/L       | 29.5                       | 1.5  | 5.0 | 6        | 118          | 270 µg/L      | 264.3                      | 10.4 | 3.9 | 6        | 98           | 20 mg/L       | 22.93                      | 0.48 | 2.1 | 5        | 115          |
|                     | 2         | 25 mg/L       | 29.5                       | 1.5  | 5.0 | 6        | 118          | 270 µg/L      | 261.9                      | 10.0 | 3.8 | 6        | 97           | 20 mg/L       | 22.95                      | 0.50 | 2.2 | 5        | 115          |
|                     | 3         | 25 mg/L       | 29.5                       | 1.4  | 4.9 | 6        | 118          | 270 µg/L      | 264.5                      | 9.8  | 3.7 | 6        | 98           | 20 mg/L       | 22.94                      | 0.48 | 2.1 | 5        | 115          |
| Grand mean          |           |               | 29.5                       | 0.03 | 0.1 | 3        |              | 263.6         | 1.4                        | 0.5  | 3   |          | 22.94        | 0.01          | 0.05                       | 3    |     |          |              |
| Ungrouped trt. mean |           |               | 29.5                       | 1.4  | 4.7 | 18       |              | 263.6         | 9.5                        | 3.6  | 18  |          | 22.94        | 0.45          | 2.0                        | 15   |     |          |              |

MMI, methimazole; MBT, mercaptobenzothiazole; PTU, propylthiouracil; ND, not detected; SD, standard deviation; CV, coefficient of variation; n/a, not applicable; Rep., replicate; Trt., treatment; Conc., concentration; Grand mean, mean of replicate means; Ungrouped treatment mean, mean of all measurements across replicates.

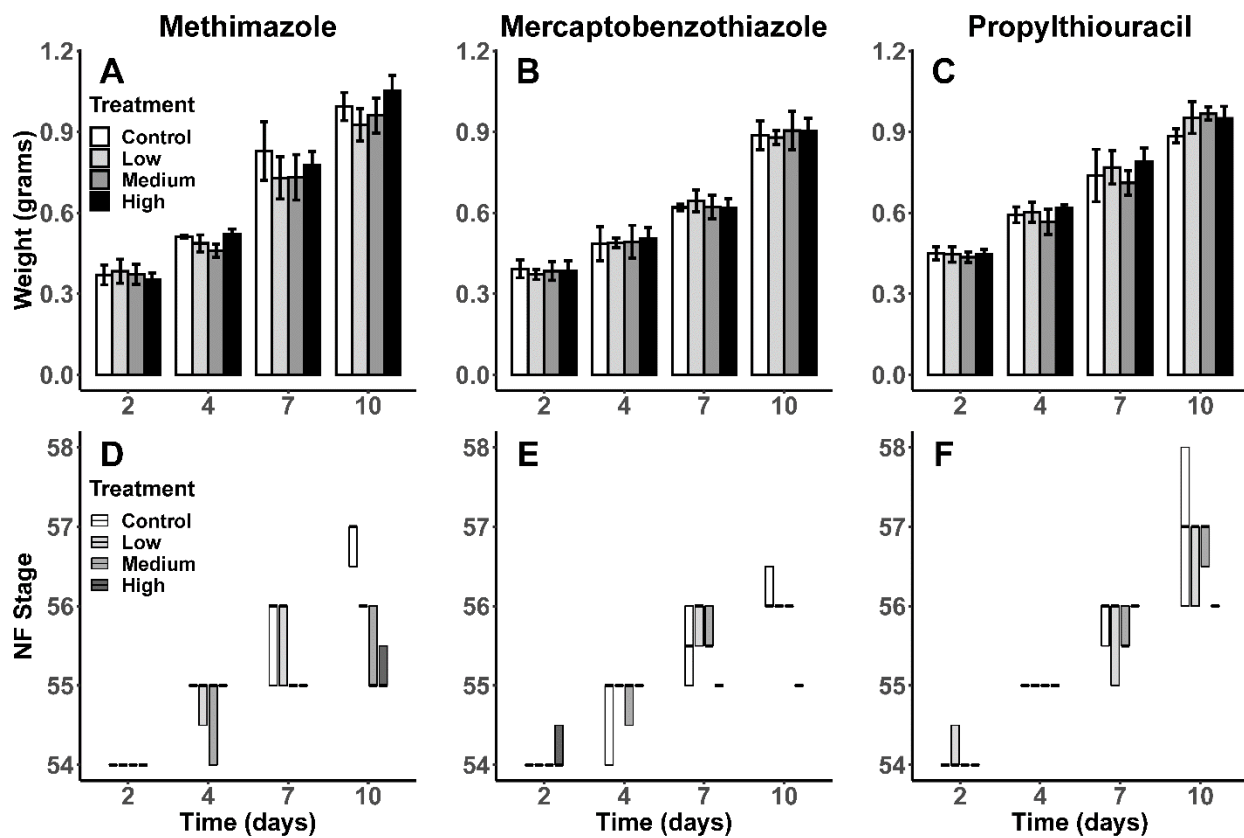

Figure S.2. Mean ( $\pm$  SD) temporal growth (A-C) and median (min-max) metamorphic development by NF stage (D-F) in three separate chemical exposure studies. There was no evidence of an effect on growth and the developmental data were not analyzed statistically. Sample sizes are  $n = 3$  except for the high PTU treatment which has a sample size of  $n = 2$ . MMI, methimazole; MBT, mercaptobenzothiazole; PTU, propylthiouracil; MMI:Low,  $55 \mu\text{M}$ ; MMI:Med,  $110 \mu\text{M}$ ; MMI:High,  $220 \mu\text{M}$ ; MBT:Low,  $0.18 \mu\text{M}$ ; MBT:Med,  $0.54 \mu\text{M}$ ; MBT:High,  $1.6 \mu\text{M}$ ; PTU:Low,  $13 \mu\text{M}$ ; PTU:Med,  $39 \mu\text{M}$ ; PTU:High,  $117.5 \mu\text{M}$ .
